# Supplementary material for: Protection effect of lutein-loaded Pickering emulsion prepared via ultrasound-assisted Maillard reaction conjugates on dry age-related macular degeneration
Source: Royal Society of Chemistry journal article supplement (doi:10.1039/d4fo00673a), 2024-01-01
Supplement: d4fo00673a1.pdf [file d4fo00673a1.pdf]

## **Protection effect of lutein-loaded Pickering emulsion prepared via ultrasound-assisted Maillard reaction conjugates on dry age-related macular degeneration**

Kangjing Liu<sup>a,b,c,d</sup>, Yu Li<sup>a,b,c,d</sup>, Xu Zhong<sup>a,b,c,d</sup>, Yitong Hou<sup>a,b,c,d</sup>, Siyuan Fei<sup>a,b,c,d</sup>, Entao Chen<sup>a,b,c,d</sup> and Mingqian Tan<sup>a,b,c,d\*</sup>

*<sup>a</sup>State Key Laboratory of Marine Food Processing and Safety Control, Dalian Polytechnic University, Dalian 116034, Liaoning, China.*

*<sup>b</sup>Academy of Food Interdisciplinary Science, School of Food Science and Technology, Dalian Polytechnic University, Dalian 116034, Liaoning, China*

*<sup>c</sup>National Engineering Research Center of Seafood, Dalian Polytechnic University, Dalian, 116034, Liaoning, China*

*<sup>d</sup>Dalian Key Laboratory for Precision Nutrition, Dalian Polytechnic University, Dalian 116034, Liaoning, China.*

**\*Corresponding author:** Mingqian Tan

Address: Qinggongyuan 1, Ganjingzi District, Dalian 116034, China. E-mail:

mqtan@dlpu.edu.cn

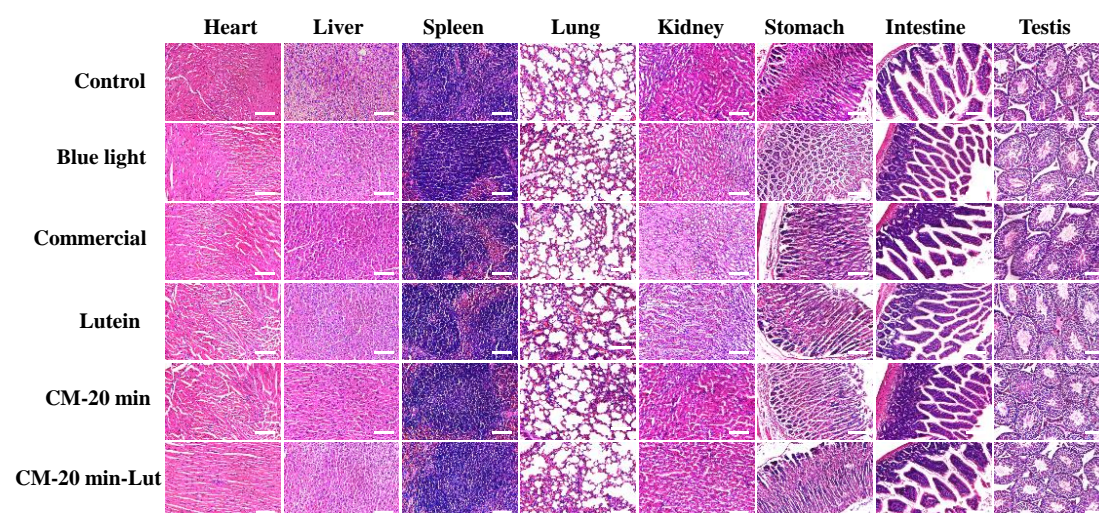

**Fig. S1.** H&E histological sections of heart, liver, spleen, lung, kidney, stomach, intestine, and testis. Scale bars were 100  $\mu$ m.
